# Supplementary material for: Magnetic Resonance Imaging after Completion of Neoadjuvant Chemotherapy Can Accurately Discriminate between No Residual Carcinoma and Residual Ductal Carcinoma In Situ in Patients with Triple-Negative Breast Cancer
Source: PubMed Central journal article supplement (PMC4750980; doi:10.1371/journal.pone.0149347), 2016-02-11
Supplement: pone.0149347.s001.pdf [file pone.0149347.s001.pdf]

| SN   | T | T_multi | T_ROC | MMG_size | MMG_exte | MMG_patt | MMG_mai |
|------|---|---------|-------|----------|----------|----------|---------|
| 7081 | 1 | 1       | 0     | 15       | 1        | 3        | 0       |
| 7118 | 1 | 1       | 0     | 50       | 1        | 3        | 1       |
| 7148 | 2 | 0       | 1     | 20       | 1        | 2        | 0       |
| 7194 | 2 | 0       | 1     | 35       | 1        | 3        | 0       |
| 7297 | 1 | 1       | 0     | 0        | 1        | 3        | 2       |
| 7346 | 1 | 1       | 0     | 25       | 2        | 2        | 1       |
| 7393 | 1 | 1       | 0     | 24       | 1        | 3        | 0       |
| 7437 | 2 | 0       | 1     | 21       | 2        | 3        | 1       |
| 7477 | 1 | 1       | 0     | 58       | 1        | 2        | 0       |
| 7517 | 1 | 1       | 0     | 0        | 2        | 2        | 2       |
| 7628 | 1 | 1       | 0     | 0        | 1        | 3        | 2       |
| 7666 | 2 | 0       | 1     | 16       | 1        | 3        | 1       |
| 7669 | 1 | 1       | 0     | 58       | 1        | 3        | 0       |
| 7744 | 1 | 1       | 0     | 29       | 1        | 3        | 0       |
| 7795 | 1 | 1       | 0     | 22       | 1        | 2        | 0       |
| 7807 | 1 | 1       | 0     | 20       | 1        | 3        | 0       |
| 7811 | 2 | 0       | 1     | 17       | 1        | 3        | 0       |
| 7965 | 2 | 0       | 1     | 45       | 1        | 3        | 1       |
| 8012 | 2 | 0       | 1     | 29       | 1        | 3        | 1       |
| 8031 | 2 | 0       | 1     | 80       | 2        | 3        | 0       |
| 8107 | 2 | 0       | 1     | 47       | 2        | 3        | 0       |
| 8126 | 1 | 1       | 0     | 21       | 1        | 3        | 1       |
| 8137 | 2 | 0       | 1     | 21       | 2        | 3        | 1       |
| 8144 | 2 | 0       | 1     | 22       | 2        | 4        | 0       |
| 8178 | 1 | 1       | 0     | 65       | 2        | 4        | 1       |
| 8190 | 1 | 1       | 0     | 47       | 1        | 2        | 0       |
| 8198 | 1 | 1       | 0     | 36       | 2        | 3        | 0       |
| 8230 | 1 | 1       | 0     | 45       | 1        | 2        | 0       |
| 8236 | 1 | 1       | 0     | 15       | 1        | 2        | 0       |
| 8238 | 2 | 0       | 1     | 16       | 2        | 3        | 2       |
| 8240 | 1 | 1       | 0     | 52       | 2        | 3        | 0       |
| 8241 | 1 | 1       | 0     | 19       | 1        | 2        | 0       |
| 8243 | 2 | 0       | 1     | 52       | 2        | 3        | 1       |
| 8280 | 2 | 0       | 1     | 40       | 2        | 2        | 1       |
| 8299 | 1 | 1       | 0     | 14       | 1        | 3        | 0       |
| 8310 | 1 | 1       | 0     | 55       | 1        | 3        | 0       |
| 8312 | 1 | 1       | 0     | 17       | 1        | 3        | 0       |
| 8330 | 2 | 0       | 1     | 20       | 2        | 3        | 0       |
| 8408 | 1 | 1       | 0     | 43       | 1        | 3        | 0       |
| 8409 | 2 | 0       | 1     | 26       | 2        | 3        | 0       |
| 8417 | 1 | 1       | 0     | 26       | 1        | 3        | 0       |
| 8459 | 2 | 0       | 1     | 19       | 1        | 2        | 0       |

|      |   |   |   |    |   |   |   |
|------|---|---|---|----|---|---|---|
| 8484 | 1 | 1 | 0 | 24 | 1 | 3 | 0 |
| 8495 | 1 | 1 | 0 | 15 | 1 | 3 | 0 |
| 8496 | 1 | 1 | 0 | 81 | 2 | 3 | 0 |
| 8503 | 2 | 0 | 1 | 52 | 2 | 3 | 1 |
| 8513 | 2 | 0 | 1 | 43 | 2 | 3 | 1 |
| 8521 | 2 | 0 | 1 | 34 | 1 | 3 | 0 |
| 8550 | 2 | 0 | 1 | 20 | 1 | 3 | 0 |
| 8574 | 1 | 1 | 0 | 12 | 1 | 2 | 0 |
| 8580 | 1 | 1 | 0 | 36 | 1 | 2 | 1 |
| 8616 | 2 | 0 | 1 | 21 | 2 | 2 | 0 |
| 8622 | 1 | 1 | 0 | 0  | 2 | 4 | 2 |
| 8653 | 2 | 0 | 1 | 27 | 1 | 3 | 0 |
| 8680 | 1 | 1 | 0 | 77 | 2 | 4 | 1 |
| 8724 | 2 | 0 | 1 | 65 | 1 | 3 | 1 |
| 8767 | 2 | 0 | 1 | 10 | 1 | 3 | 1 |
| 8773 | 1 | 1 | 0 | 20 | 1 | 3 | 1 |
| 8784 | 1 | 1 | 0 | 17 | 2 | 2 | 0 |
| 8793 | 1 | 1 | 0 | 35 | 2 | 3 | 0 |
| 8838 | 2 | 0 | 1 | 20 | 1 | 3 | 1 |
| 8878 | 1 | 1 | 0 | 10 | 1 | 3 | 0 |
| 8879 | 2 | 0 | 1 | 27 | 1 | 3 | 0 |
| 8904 | 2 | 0 | 1 | 40 | 1 | 3 | 1 |
| 8942 | 1 | 1 | 0 | 0  | 1 | 3 | 2 |
| 9000 | 2 | 0 | 1 | 32 | 2 | 3 | 1 |
| 9055 | 1 | 1 | 0 | 24 | 1 | 3 | 0 |
| 9063 | 1 | 1 | 0 | 20 | 1 | 3 | 0 |
| 9064 | 2 | 0 | 1 | 60 | 1 | 3 | 1 |
| 9068 | 1 | 1 | 0 | 45 | 2 | 3 | 1 |
| 9113 | 2 | 0 | 1 | 19 | 1 | 2 | 1 |
| 9148 | 1 | 1 | 0 | 52 | 2 | 3 | 1 |
| 9165 | 1 | 1 | 0 | 30 | 1 | 3 | 0 |
| 9166 | 1 | 1 | 0 | 27 | 2 | 3 | 0 |
| 9228 | 2 | 0 | 1 | 9  | 1 | 2 | 1 |
| 9263 | 1 | 1 | 0 | 20 | 1 | 3 | 0 |
| 9277 | 1 | 1 | 0 | 24 | 1 | 3 | 0 |
| 9287 | 1 | 1 | 0 | 24 | 2 | 2 | 0 |
| 9296 | 2 | 0 | 1 | 28 | 2 | 3 | 0 |
| 9323 | 2 | 0 | 1 | 40 | 1 | 3 | 1 |
| 9337 | 2 | 0 | 1 | 36 | 2 | 3 | 1 |
| 9352 | 1 | 1 | 0 | 24 | 1 | 2 | 0 |
| 9357 | 1 | 1 | 0 | 78 | 2 | 2 | 0 |
| 9375 | 1 | 1 | 0 | 14 | 1 | 3 | 1 |
| 9385 | 2 | 0 | 1 | 22 | 1 | 2 | 0 |

|        |   |   |   |     |   |   |   |
|--------|---|---|---|-----|---|---|---|
| 9395   | 2 | 0 | 1 | 65  | 2 | 2 | 1 |
| 9406   | 2 | 0 | 1 | 31  | 1 | 3 | 1 |
| 9421   | 2 | 0 | 1 | 0   | 2 | 3 | 2 |
| 9487   | 2 | 0 | 1 | 22  | 1 | 3 | 0 |
| 9535   | 2 | 0 | 1 | 29  | 1 | 2 | 0 |
| 9598   | 1 | 1 | 0 | 10  | 1 | 2 | 0 |
| 9616   | 1 | 1 | 0 | 0   | 1 | 3 | 2 |
| 9675   | 1 | 1 | 0 | 30  | 2 | 2 | 0 |
| 9777   | 2 | 0 | 1 | 30  | 1 | 3 | 1 |
| 9796   | 2 | 0 | 1 | 27  | 1 | 2 | 1 |
| 9827   | 1 | 1 | 0 | 38  | 1 | 4 | 0 |
| 9860   | 1 | 1 | 0 | 0   | 1 | 4 | 2 |
| 9900   | 2 | 0 | 1 | 110 | 2 | 3 | 1 |
| 9903   | 1 | 1 | 0 | 82  | 2 | 3 | 1 |
| 969300 | 1 | 1 | 0 | 34  | 1 | 3 | 0 |
| 969400 | 1 | 1 | 0 | 14  | 2 | 3 | 0 |
| 970500 | 2 | 0 | 1 | 0   | 1 | 3 | 2 |
| 972600 | 1 | 1 | 0 | 50  | 2 | 3 | 0 |
| 973900 | 1 | 1 | 0 | 22  | 1 | 3 | 0 |
| 974400 | 1 | 1 | 0 | 24  | 1 | 3 | 0 |
| 974500 | 2 | 0 | 1 | 16  | 1 | 3 | 0 |
| 975300 | 2 | 0 | 1 | 50  | 2 | 3 | 1 |
| 977100 | 2 | 0 | 1 | 40  | 2 | 3 | 1 |
| 977200 | 1 | 1 | 0 | 16  | 1 | 2 | 0 |
| 981200 | 1 | 1 | 0 | 20  | 1 | 2 | 0 |
| 982100 | 1 | 1 | 0 | 90  | 2 | 2 | 0 |
| 982800 | 2 | 0 | 1 | 76  | 2 | 3 | 1 |
| 984600 | 1 | 1 | 0 | 28  | 1 | 3 | 0 |
| 985700 | 1 | 1 | 0 | 19  | 1 | 3 | 0 |
| 987400 | 1 | 1 | 0 | 30  | 1 | 4 | 0 |
| 991100 | 2 | 0 | 1 | 59  | 2 | 3 | 0 |
| 992500 | 1 | 1 | 0 | 0   | 2 | 4 | 2 |

| MMG_assc | MMG_shape | MMG_density | US_size | US_shape | US_margin   | US_orientation | US_orientation |
|----------|-----------|-------------|---------|----------|-------------|----------------|----------------|
| 0 1      | iso       |             | 15      | 1        | circumscrib | not parallel   | 1              |
| 1 1      | high      |             | 44      | 1        | indistinct  | parallel       | 0              |
| 0 1      | iso       |             | 11      | 1        | indistinct  | not parallel   | 1              |
| 0 1      | high      |             | 23      | 1        | microlobul  | parallel       | 0              |
| 0 0      | no        |             | 13      | 1        | spiculated  | parallel       | 0              |
| 1 2      | iso       |             | 19      | 3        | spiculated  | not parallel   | 1              |
| 1 1      | iso       |             | 24      | 1        | indistinct  | not parallel   | 1              |
| 1 2      | iso       |             | 25      | 3        | indistinct  | not parallel   | 1              |
| 0 1      | iso       |             | 49      | 1        | indistinct  | parallel       | 0              |
| 0 0      | no        |             | 4       | 1        | indistinct  | parallel       | 0              |
| 0 0      | no        |             | 15      | 1        | indistinct  | parallel       | 0              |
| 1 2      | iso       |             | 13      | 3        | microlobul  | parallel       | 0              |
| 0 1      | high      |             | 53      | 2        | circumscrib | parallel       | 0              |
| 0 1      | iso       |             | 24      | 1        | microlobul  | parallel       | 0              |
| 0 1      | high      |             | 19      | 2        | spiculated  | not parallel   | 1              |
| 1 1      | high      |             | 22      | 1        | angular     | parallel       | 0              |
| 1 1      | iso       |             | 20      | 3        | microlobul  | parallel       | 0              |
| 1 1      | iso       |             | 42      | 3        | microlobul  | parallel       | 0              |
| 1 1      | iso       |             | 27      | 1        | microlobul  | parallel       | 0              |
| 0 2      | iso       |             | 80      | 1        | spiculated  | parallel       | 0              |
| 0 2      | high      |             | 16      | 3        | spiculated  | not parallel   | 1              |
| 1 2      | iso       |             | 23      | 3        | angular     | not parallel   | 1              |
| 1 1      | iso       |             | 22      | 3        | spiculated  | not parallel   | 1              |
| 1 1      | iso       |             | 43      | 1        | indistinct  | parallel       | 0              |
| 1 0      | no        |             | 50      | 1        | indistinct  | parallel       | 0              |
| 0 2      | high      |             | 26      | 1        | microlobul  | not parallel   | 1              |
| 0 1      | high      |             | 36      | 1        | indistinct  | parallel       | 0              |
| 0 1      | iso       |             | 49      | 1        | circumscrib | parallel       | 0              |
| 0 1      | iso       |             | 16      | 1        | indistinct  | not parallel   | 1              |
| 1 0      | no        |             | 33      | 1        | indistinct  | parallel       | 0              |
| 1 1      | high      |             | 48      | 1        | angular     | parallel       | 0              |
| 0 1      | high      |             | 19      | 2        | microlobul  | not parallel   | 1              |
| 1 0      | no        |             | 60      | 3        | spiculated  | not parallel   | 1              |
| 1 0      | no        |             | 40      | 3        | angular     | parallel       | 0              |
| 0 1      | iso       |             | 11      | 1        | circumscrib | parallel       | 0              |
| 0 1      | high      |             | 52      | 2        | circumscrib | not parallel   | 1              |
| 0 1      | high      |             | 14      | 2        | microlobul  | not parallel   | 1              |
| 1 2      | high      |             | 21      | 1        | microlobul  | not parallel   | 1              |
| 0 1      | high      |             | 32      | 2        | microlobul  | not parallel   | 1              |
| 0 1      | high      |             | 19      | 1        | microlobul  | not parallel   | 1              |
| 0 1      | high      |             | 31      | 3        | indistinct  | parallel       | 0              |
| 1 1      | high      |             | 22      | 1        | microlobul  | parallel       | 0              |

|     |      |    |                          |   |
|-----|------|----|--------------------------|---|
| 1 1 | iso  | 13 | 2 indistinct not paralle | 1 |
| 0 1 | iso  | 17 | 3 spiculated not paralle | 1 |
| 0 2 | high | 80 | 1 microlobul parallel    | 0 |
| 1 0 | no   | 55 | 1 indistinct parallel    | 0 |
| 1 0 | no   | 50 | 1 indistinct not paralle | 1 |
| 0 1 | high | 31 | 3 microlobul parallel    | 0 |
| 0 1 | iso  | 27 | 1 indistinct not paralle | 1 |
| 0 1 | iso  | 9  | 1 angular parallel       | 0 |
| 1 2 | high | 22 | 1 indistinct not paralle | 1 |
| 0 1 | iso  | 31 | 1 indistinct parallel    | 0 |
| 0 0 | no   | 30 | 1 indistinct parallel    | 0 |
| 0 1 | high | 27 | 1 microlobul parallel    | 0 |
| 1 0 | no   | 70 | 1 indistinct parallel    | 0 |
| 1 0 | no   | 18 | 1 microlobul parallel    | 0 |
| 1 0 | no   | 15 | 1 indistinct parallel    | 0 |
| 1 0 | no   | 11 | 1 indistinct not paralle | 1 |
| 0 1 | iso  | 13 | 1 indistinct not paralle | 1 |
| 0 2 | iso  | 32 | 3 spiculated not paralle | 1 |
| 1 1 | iso  | 22 | 1 microlobul parallel    | 0 |
| 0 1 | iso  | 9  | 1 indistinct parallel    | 0 |
| 0 1 | iso  | 20 | 3 indistinct parallel    | 0 |
| 1 0 | no   | 40 | 1 indistinct parallel    | 0 |
| 0 0 | no   | 14 | 1 indistinct parallel    | 0 |
| 1 0 | no   | 39 | 1 microlobul parallel    | 0 |
| 0 1 | high | 27 | 1 microlobul not paralle | 1 |
| 0 1 | high | 16 | 1 indistinct not paralle | 1 |
| 1 1 | high | 51 | 3 microlobul parallel    | 0 |
| 1 1 | high | 38 | 1 indistinct parallel    | 0 |
| 1 0 | no   | 25 | 1 spiculated parallel    | 0 |
| 1 0 | no   | 49 | 1 indistinct parallel    | 0 |
| 0 1 | iso  | 25 | 2 microlobul not paralle | 1 |
| 0 1 | iso  | 30 | 1 microlobul not paralle | 1 |
| 1 1 | iso  | 10 | 3 indistinct not paralle | 1 |
| 0 2 | iso  | 22 | 3 microlobul not paralle | 1 |
| 0 1 | iso  | 17 | 2 indistinct not paralle | 1 |
| 0 2 | high | 18 | 3 spiculated parallel    | 0 |
| 1 2 | high | 43 | 1 spiculated parallel    | 0 |
| 1 0 | no   | 20 | 3 indistinct parallel    | 0 |
| 1 0 | no   | 20 | 1 spiculated parallel    | 0 |
| 0 1 | iso  | 23 | 1 microlobul parallel    | 0 |
| 0 2 | high | 80 | 3 spiculated parallel    | 0 |
| 1 0 | no   | 10 | 1 indistinct parallel    | 0 |
| 0 1 | high | 23 | 1 microlobul parallel    | 0 |

|     |      |     |                          |   |
|-----|------|-----|--------------------------|---|
| 1 2 | iso  | 60  | 3 indistinct not paralle | 1 |
| 1 1 | iso  | 25  | 1 angular parallel       | 0 |
| 0 0 | no   | 15  | 3 spiculated parallel    | 0 |
| 0 2 | high | 22  | 1 microlobul parallel    | 0 |
| 0 1 | high | 24  | 3 spiculated not paralle | 1 |
| 0 2 | high | 10  | 2 microlobul not paralle | 1 |
| 0 0 | no   | 27  | 3 angular parallel       | 0 |
| 0 2 | iso  | 44  | 3 microlobul parallel    | 0 |
| 1 2 | iso  | 22  | 3 angular parallel       | 0 |
| 1 2 | iso  | 25  | 3 spiculated parallel    | 0 |
| 0 1 | iso  | 38  | 1 spiculated parallel    | 0 |
| 0 0 | no   | 27  | 3 angular parallel       | 0 |
| 1 0 | no   | 100 | 3 microlobul parallel    | 0 |
| 1 0 | no   | 100 | 3 microlobul parallel    | 0 |
| 0 2 | high | 23  | 1 angular not paralle    | 1 |
| 0 1 | iso  | 15  | 3 microlobul not paralle | 1 |
| 0 0 | no   | 11  | 2 microlobul parallel    | 0 |
| 0 2 | iso  | 50  | 1 microlobul parallel    | 0 |
| 0 1 | iso  | 21  | 1 microlobul parallel    | 0 |
| 0 1 | iso  | 14  | 1 microlobul parallel    | 0 |
| 0 1 | iso  | 22  | 3 spiculated parallel    | 0 |
| 1 1 | iso  | 26  | 1 indistinct parallel    | 0 |
| 1 0 | no   | 26  | 3 angular parallel       | 0 |
| 0 1 | high | 17  | 2 spiculated parallel    | 0 |
| 0 1 | iso  | 24  | 3 angular not paralle    | 1 |
| 0 2 | high | 90  | 3 indistinct not paralle | 1 |
| 1 0 | no   | 69  | 3 spiculated not paralle | 1 |
| 0 2 | iso  | 28  | 3 angular parallel       | 0 |
| 0 1 | no   | 20  | 3 spiculated parallel    | 0 |
| 0 1 | iso  | 37  | 3 microlobul not paralle | 1 |
| 0 2 | iso  | 50  | 3 microlobul parallel    | 0 |
| 0 0 | no   | 37  | 3 microlobul parallel    | 0 |

| US_echo | US_posteri | US_posteri | US_calcific | MR_size | MR_BPE     | MR_preser | MR_shape |
|---------|------------|------------|-------------|---------|------------|-----------|----------|
| hypo    | enhancem   | 2          | 0           | 20      | 2 mass     | oval      |          |
| hypo    | enhancem   | 2          | 0           | 37      | 3 mass     | oval      |          |
| hypo    | shadowing  | 1          | 0           | 20      | 1 mass     | irregular |          |
| hypo    | enhancem   | 2          | 0           | 30      | 2 mass     | oval      |          |
| hypo    | no         | 0          | 0           | 10      | 2 mass     | round     |          |
| iso     | shadowing  | 1          | 0           | 22      | 1 mass     | irregular |          |
| hypo    | enhancem   | 2          | 1           | 16      | 1 mass     | round     |          |
| hypo    | no         | 0          | 1           | 29      | 1 mass     | irregular |          |
| hypo    | enhancem   | 2          | 0           | 67      | 1 non-mass | oval      |          |
| iso     | no         | 0          | 0           | 4       | 1 mass     | round     |          |
| iso     | enhancem   | 2          | 0           | 19      | 1 mass     | oval      |          |
| hypo    | shadowing  | 1          | 1           | 28      | 2 mass     | irregular |          |
| hypo    | enhancem   | 2          | 0           | 47      | 1 mass     | oval      |          |
| hypo    | no         | 0          | 0           | 29      | 1 mass     | oval      |          |
| hypo    | shadowing  | 1          | 0           | 20      | 1 mass     | oval      |          |
| hypo    | enhancem   | 2          | 0           | 20      | 1 mass     | oval      |          |
| hypo    | enhancem   | 2          | 0           | 22      | 2 mass     | oval      |          |
| hypo    | shadowing  | 1          | 1           | 37      | 1 mass     | oval      |          |
| hypo    | no         | 0          | 1           | 30      | 3 mass     | oval      |          |
| hypo    | shadowing  | 1          | 0           | 78      | 3 non-mass | irregular |          |
| hypo    | no         | 0          | 0           | 36      | 2 non-mass | irregular |          |
| iso     | enhancem   | 2          | 1           | 18      | 2 mass     | oval      |          |
| hypo    | no         | 0          | 1           | 18      | 1 mass     | round     |          |
| hypo    | no         | 0          | 1           | 39      | 1 mass     | oval      |          |
| hypo    | shadowing  | 1          | 1           | 63      | 1 mass     | irregular |          |
| hypo    | no         | 0          | 0           | 34      | 1 mass     | round     |          |
| hypo    | no         | 0          | 0           | 39      | 1 non-mass | oval      |          |
| hypo    | enhancem   | 2          | 0           | 55      | 1 mass     | oval      |          |
| hypo    | enhancem   | 2          | 0           | 13      | 1 mass     | round     |          |
| hypo    | shadowing  | 1          | 0           | 29      | 1 mass     | oval      |          |
| hypo    | shadowing  | 1          | 0           | 40      | 1 mass     | round     |          |
| iso     | enhancem   | 2          | 0           | 23      | 1 mass     | round     |          |
| hypo    | shadowing  | 1          | 0           | 60      | 2 non-mass | irregular |          |
| hypo    | shadowing  | 1          | 0           | 43      | 1 mass     | irregular |          |
| hypo    | no         | 0          | 0           | 9       | 1 mass     | oval      |          |
| hypo    | shadowing  | 1          | 0           | 55      | 2 mass     | round     |          |
| hypo    | enhancem   | 2          | 0           | 14      | 1 mass     | round     |          |
| hypo    | enhancem   | 2          | 0           | 28      | 2 mass     | irregular |          |
| hypo    | enhancem   | 2          | 0           | 30      | 1 mass     | round     |          |
| hypo    | enhancem   | 2          | 0           | 22      | 1 mass     | round     |          |
| hypo    | no         | 0          | 0           | 26      | 3 mass     | oval      |          |
| hypo    | no         | 0          | 0           | 18      | 1 mass     | oval      |          |

|       |           |   |   |    |            |           |
|-------|-----------|---|---|----|------------|-----------|
| hypo  | no        | 0 | 0 | 20 | 1 mass     | round     |
| hypo  | no        | 0 | 0 | 15 | 1 mass     | oval      |
| hyper | shadowing | 1 | 0 | 71 | 1 mass     | irregular |
| hyper | no        | 0 | 0 | 33 | 2 non-mass | oval      |
| hypo  | shadowing | 1 | 1 | 40 | 1 mass     | oval      |
| hypo  | enhancem  | 2 | 0 | 30 | 1 mass     | oval      |
| hypo  | enhancem  | 2 | 0 | 25 | 3 mass     | oval      |
| iso   | no        | 0 | 0 | 9  | 1 mass     | oval      |
| hypo  | no        | 0 | 1 | 28 | 1 mass     | oval      |
| hypo  | no        | 0 | 0 | 29 | 1 mass     | oval      |
| hypo  | no        | 0 | 0 | 32 | 1 mass     | oval      |
| hypo  | enhancem  | 2 | 0 | 29 | 1 mass     | round     |
| hypo  | no        | 0 | 1 | 65 | 1 non-mass | irregular |
| hypo  | no        | 0 | 0 | 18 | 1 mass     | oval      |
| hypo  | no        | 0 | 1 | 12 | 1 non-mass | oval      |
| iso   | no        | 0 | 1 | 24 | 1 non-mass | oval      |
| hypo  | enhancem  | 2 | 0 | 16 | 1 mass     | oval      |
| hypo  | no        | 0 | 0 | 28 | 1 mass     | oval      |
| hypo  | enhancem  | 2 | 1 | 21 | 1 mass     | oval      |
| hypo  | no        | 0 | 0 | 10 | 1 mass     | oval      |
| hypo  | no        | 0 | 0 | 20 | 1 non-mass | oval      |
| iso   | shadowing | 1 | 1 | 45 | 1 mass     | oval      |
| iso   | no        | 0 | 0 | 13 | 1 mass     | oval      |
| hypo  | no        | 0 | 1 | 32 | 1 mass     | oval      |
| hypo  | no        | 0 | 0 | 24 | 1 mass     | oval      |
| hypo  | enhancem  | 2 | 0 | 22 | 1 mass     | oval      |
| hypo  | no        | 0 | 1 | 51 | 1 non-mass | oval      |
| hypo  | enhancem  | 2 | 0 | 38 | 1 mass     | oval      |
| hypo  | enhancem  | 2 | 1 | 18 | 1 mass     | oval      |
| hypo  | no        | 0 | 1 | 42 | 1 mass     | oval      |
| hypo  | enhancem  | 2 | 0 | 24 | 2 mass     | oval      |
| hypo  | enhancem  | 2 | 0 | 28 | 1 mass     | oval      |
| hypo  | shadowing | 1 | 1 | 14 | 1 mass     | irregular |
| hypo  | enhancem  | 2 | 0 | 27 | 2 mass     | irregular |
| hypo  | no        | 0 | 0 | 24 | 1 mass     | oval      |
| iso   | no        | 0 | 0 | 17 | 1 mass     | irregular |
| hypo  | shadowing | 1 | 0 | 43 | 1 mass     | oval      |
| hyper | no        | 0 | 1 | 47 | 1 non-mass | irregular |
| hypo  | no        | 0 | 1 | 30 | 1 non-mass | oval      |
| hypo  | enhancem  | 2 | 0 | 20 | 1 mass     | oval      |
| iso   | shadowing | 1 | 0 | 70 | 1 non-mass | irregular |
| hypo  | no        | 0 | 1 | 12 | 1 mass     | oval      |
| hypo  | enhancem  | 2 | 0 | 24 | 1 mass     | oval      |



|      |           |   |   |     |            |           |
|------|-----------|---|---|-----|------------|-----------|
| hypo | shadowing | 1 | 1 | 65  | 1 non-mass | irregular |
| hypo | enhancem  | 2 | 1 | 34  | 1 mass     | round     |
| iso  | shadowing | 1 | 0 | 8   | 1 mass     | round     |
| hypo | no        | 0 | 0 | 19  | 2 mass     | oval      |
| hypo | no        | 0 | 0 | 29  | 2 mass     | irregular |
| hypo | no        | 0 | 0 | 20  | 1 mass     | oval      |
| hypo | enhancem  | 2 | 0 | 15  | 1 mass     | irregular |
| hypo | no        | 0 | 0 | 37  | 1 mass     | irregular |
| hypo | shadowing | 1 | 0 | 27  | 1 non-mass | irregular |
| iso  | no        | 0 | 1 | 27  | 1 mass     | irregular |
| hypo | enhancem  | 2 | 0 | 26  | 1 mass     | round     |
| iso  | enhancem  | 2 | 0 | 28  | 3 mass     | round     |
| hypo | shadowing | 1 | 1 | 93  | 1 non-mass | irregular |
| hypo | shadowing | 1 | 1 | 95  | 2 non-mass | irregular |
| hypo | enhancem  | 2 | 0 | 23  | 1 mass     | oval      |
| hypo | no        | 0 | 0 | 13  | 1 mass     | round     |
| hypo | no        | 0 | 0 | 11  | 2 mass     | round     |
| hypo | shadowing | 1 | 0 | 53  | 1 non-mass | irregular |
| hypo | enhancem  | 2 | 0 | 22  | 1 mass     | oval      |
| hypo | no        | 0 | 0 | 16  | 1 mass     | oval      |
| iso  | no        | 0 | 0 | 17  | 1 mass     | round     |
| iso  | no        | 0 | 1 | 14  | 1 mass     | round     |
| hypo | no        | 0 | 1 | 16  | 1 mass     | round     |
| hypo | no        | 0 | 0 | 19  | 1 mass     | oval      |
| hypo | enhancem  | 2 | 0 | 19  | 1 mass     | oval      |
| hypo | shadowing | 1 | 0 | 100 | 1 non-mass | irregular |
| hypo | no        | 0 | 1 | 68  | 1 non-mass | irregular |
| hypo | enhancem  | 2 | 0 | 26  | 1 mass     | oval      |
| hypo | no        | 0 | 0 | 24  | 1 mass     | irregular |
| hypo | enhancem  | 2 | 0 | 57  | 1 mass     | irregular |
| hypo | no        | 0 | 0 | 49  | 1 non-mass | irregular |
| hypo | no        | 0 | 0 | 43  | 2 mass     | oval      |

| MR_margir         | MR_enh_p | MR_T2WI | MR_Delay | MR_necros | MR_peritui | MMG_redi | MMG_resic |
|-------------------|----------|---------|----------|-----------|------------|----------|-----------|
| spiculated rim    | high     | wash    | no       | no        |            | 0        | 0         |
| irregular rim     | high     | wash    | yes      | no        |            | 2        | 1         |
| irregular homo    | high     | wash    | no       | no        |            | 2        | 1         |
| irregular hetero  | high     | wash    | no       | no        |            | 2        | 1         |
| spiculated homo   | iso      | wash    | no       | no        |            | 0        | 0         |
| spiculated rim    | high     | wash    | no       | no        |            | 2        | 1         |
| irregular homo    | high     | wash    | no       | no        |            | 2        | 1         |
| irregular homo    | high     | wash    | no       | no        |            | 2        | 1         |
| irregular rim     | high     | wash    | yes      | no        |            | 2        | 1         |
| well homo         | iso      | wash    | no       | no        |            | 0        | 0         |
| irregular rim     | high     | wash    | yes      | no        |            | 0        | 0         |
| spiculated hetero | iso      | wash    | no       | no        |            | 2        | 1         |
| well homo         | high     | wash    | no       | yes       |            | 2        | 1         |
| irregular hetero  | iso      | wash    | no       | no        |            | 2        | 1         |
| well homo         | iso      | wash    | no       | no        |            | 2        | 1         |
| well homo         | high     | wash    | no       | no        |            | 2        | 1         |
| irregular hetero  | high     | wash    | no       | no        |            | 2        | 1         |
| irregular hetero  | high     | wash    | no       | no        |            | 2        | 1         |
| irregular rim     | high     | wash    | yes      | yes       |            | 2        | 1         |
| irregular hetero  | high     | wash    | yes      | yes       |            | 2        | 1         |
| irregular hetero  | iso      | wash    | no       | no        |            | 2        | 1         |
| irregular homo    | iso      | wash    | no       | yes       |            | 2        | 1         |
| irregular hetero  | high     | wash    | no       | no        |            | 2        | 1         |
| spiculated hetero | iso      | wash    | no       | no        |            | 2        | 1         |
| irregular hetero  | iso      | wash    | no       | yes       |            | 2        | 1         |
| irregular homo    | high     | wash    | no       | yes       |            | 2        | 1         |
| irregular homo    | iso      | wash    | no       | yes       |            | 2        | 1         |
| irregular hetero  | high     | wash    | yes      | yes       |            | 2        | 1         |
| well homo         | high     | wash    | no       | yes       |            | 0        | 0         |
| irregular hetero  | high     | wash    | no       | yes       |            | 2        | 1         |
| irregular homo    | high     | wash    | no       | yes       |            | 2        | 1         |
| irregular hetero  | high     | wash    | no       | yes       |            | 2        | 1         |
| irregular hetero  | iso      | wash    | no       | yes       |            | 2        | 1         |
| irregular hetero  | iso      | wash    | no       | yes       |            | 2        | 1         |
| irregular homo    | high     | wash    | no       | no        |            | 0        | 0         |
| well hetero       | iso      | wash    | no       | yes       |            | 2        | 1         |
| irregular homo    | high     | wash    | no       | no        |            | 2        | 1         |
| irregular homo    | high     | wash    | no       | no        |            | 2        | 1         |
| well rim          | high     | wash    | yes      | no        |            | 2        | 1         |
| well rim          | high     | wash    | yes      | yes       |            | 0        | 0         |
| irregular hetero  | high     | wash    | no       | yes       |            | 0        | 0         |
| well hetero       | high     | wash    | no       | yes       |            | 2        | 1         |

|            |        |      |         |     |     |   |   |
|------------|--------|------|---------|-----|-----|---|---|
| irregular  | hetero | high | wash    | no  | no  | 2 | 1 |
| spiculated | homo   | high | wash    | no  | no  | 0 | 0 |
| irregular  | hetero | iso  | wash    | no  | yes | 0 | 0 |
| irregular  | rim    | high | plateau | no  | no  | 2 | 1 |
| irregular  | hetero | iso  | wash    | no  | yes | 2 | 1 |
| well       | hetero | high | wash    | no  | no  | 2 | 1 |
| well       | homo   | high | wash    | no  | no  | 0 | 0 |
| well       | homo   | iso  | plateau | no  | no  | 2 | 1 |
| irregular  | homo   | high | wash    | no  | no  | 2 | 1 |
| irregular  | hetero | high | wash    | no  | yes | 0 | 0 |
| irregular  | hetero | iso  | wash    | no  | no  | 0 | 0 |
| irregular  | hetero | high | wash    | no  | yes | 2 | 1 |
| irregular  | hetero | iso  | wash    | no  | no  | 2 | 1 |
| irregular  | homo   | iso  | wash    | no  | no  | 2 | 1 |
| irregular  | hetero | iso  | wash    | no  | no  | 2 | 1 |
| irregular  | hetero | iso  | plateau | no  | no  | 2 | 1 |
| irregular  | hetero | high | wash    | no  | yes | 0 | 0 |
| irregular  | hetero | high | plateau | no  | no  | 2 | 1 |
| irregular  | hetero | high | wash    | no  | no  | 2 | 1 |
| irregular  | homo   | high | wash    | no  | no  | 0 | 0 |
| irregular  | homo   | high | wash    | no  | no  | 2 | 1 |
| well       | hetero | high | wash    | no  | yes | 2 | 1 |
| irregular  | homo   | high | wash    | no  | no  | 0 | 0 |
| irregular  | hetero | high | wash    | no  | yes | 2 | 1 |
| irregular  | hetero | high | wash    | no  | yes | 2 | 1 |
| well       | hetero | high | wash    | no  | yes | 0 | 0 |
| irregular  | hetero | iso  | wash    | no  | yes | 2 | 1 |
| irregular  | hetero | high | wash    | no  | no  | 2 | 1 |
| irregular  | hetero | high | wash    | no  | no  | 2 | 1 |
| irregular  | hetero | high | wash    | no  | yes | 2 | 1 |
| well       | rim    | high | wash    | no  | no  | 0 | 0 |
| well       | homo   | high | wash    | no  | no  | 0 | 0 |
| well       | hetero | high | wash    | no  | no  | 2 | 1 |
| spiculated | homo   | high | wash    | no  | no  | 0 | 0 |
| irregular  | hetero | high | wash    | no  | no  | 2 | 1 |
| irregular  | hetero | iso  | wash    | no  | no  | 0 | 0 |
| irregular  | hetero | high | wash    | no  | no  | 2 | 1 |
| irregular  | hetero | high | wash    | no  | no  | 2 | 1 |
| irregular  | homo   | high | wash    | no  | no  | 2 | 1 |
| irregular  | homo   | iso  | wash    | no  | no  | 2 | 1 |
| irregular  | homo   | iso  | wash    | no  | yes | 2 | 1 |
| irregular  | hetero | iso  | wash    | no  | no  | 1 | 1 |
| irregular  | hetero | iso  | wash    | yes | no  | 0 | 0 |

|            |        |      |      |     |     |   |   |
|------------|--------|------|------|-----|-----|---|---|
| irregular  | hetero | high | wash | no  | yes | 1 | 1 |
| irregular  | hetero | iso  | wash | yes | no  | 2 | 1 |
| well       | homo   | iso  | wash | no  | no  | 2 | 1 |
| irregular  | hetero | iso  | wash | no  | no  | 2 | 1 |
| irregular  | rim    | iso  | wash | yes | no  | 2 | 1 |
| irregular  | hetero | high | wash | no  | no  | 0 | 0 |
| irregular  | hetero | high | wash | yes | no  | 2 | 1 |
| irregular  | hetero | high | wash | no  | no  | 0 | 0 |
| irregular  | hetero | high | wash | no  | no  | 2 | 1 |
| irregular  | hetero | high | wash | no  | no  | 1 | 1 |
| well       | hetero | high | wash | no  | no  | 0 | 0 |
| irregular  | hetero | iso  | wash | no  | no  | 2 | 1 |
| irregular  | rim    | iso  | wash | no  | no  | 2 | 1 |
| irregular  | hetero | iso  | wash | no  | no  | 2 | 1 |
| irregular  | homo   | high | wash | yes | no  | 2 | 1 |
| irregular  | hetero | high | wash | no  | no  | 0 | 0 |
| irregular  | hetero | iso  | wash | no  | no  | 0 | 0 |
| irregular  | hetero | iso  | wash | no  | no  | 2 | 1 |
| irregular  | hetero | iso  | wash | yes | no  | 1 | 1 |
| irregular  | hetero | high | wash | no  | no  | 0 | 0 |
| irregular  | homo   | iso  | wash | no  | no  | 0 | 0 |
| irregular  | homo   | iso  | wash | no  | no  | 1 | 1 |
| irregular  | hetero | iso  | wash | no  | no  | 2 | 1 |
| irregular  | hetero | high | wash | no  | no  | 0 | 0 |
| well       | homo   | high | wash | no  | no  | 0 | 0 |
| irregular  | homo   | iso  | wash | no  | yes | 2 | 1 |
| irregular  | hetero | high | wash | no  | no  | 2 | 1 |
| irregular  | hetero | iso  | wash | no  | no  | 2 | 1 |
| spiculated | homo   | iso  | wash | no  | no  | 1 | 1 |
| irregular  | hetero | high | wash | yes | yes | 2 | 1 |
| irregular  | homo   | iso  | wash | no  | no  | 2 | 1 |
| irregular  | hetero | iso  | wash | no  | no  | 0 | 0 |

| US_residue | MR_residue | Age | Age_40 | Grc | Final_Men | BMI_Group | NCT_regim  | PreopCTx_ |
|------------|------------|-----|--------|-----|-----------|-----------|------------|-----------|
| 0          | 0          | 37  | 0      | 0   | 1         | 2         | AC+Taxote  |           |
| 0          | 1          | 27  | 0      | 0   | 0         | 1         | AC+ Taxot  |           |
| 1          | 1          | 50  | 1      | 1   | 0         | 2         | AC+Taxote  |           |
| 1          | 1          | 42  | 1      | 0   | 0         | 2         | AC+Taxote  |           |
| 1          | 0          | 50  | 1      | 0   | 0         | 1         | AC+Taxote  |           |
| 1          | 1          | 60  | 1      | 1   | 0         | 2         | AC+Taxote  |           |
| 1          | 1          | 50  | 1      | 0   | 0         | 2         | AC+Taxote  |           |
| 1          | 1          | 47  | 1      | 1   | 1         | 1         | AC+Taxote  |           |
| 1          | 1          | 47  | 1      | 0   | 0         | 2         | AC+Taxote  |           |
| 0          | 0          | 54  | 1      | 0   | 1         | 1         | AC+ Taxot  |           |
| 0          | 1          | 41  | 1      | 0   | 0         | 3         | taxol+carb |           |
| 0          | 1          | 51  | 1      | 0   | 0         | 1         | AC+Taxote  |           |
| 1          | 0          | 46  | 1      | 0   | 1         | 1         | AC+Taxote  |           |
| 1          | 0          | 46  | 1      | 0   | 0         | 1         | AC+Taxote  |           |
| 1          | 0          | 65  | 1      | 1   | 1         | 1         | AC+Taxote  |           |
| 0          | 0          | 56  | 1      | 1   | 0         | 1         | AC+Taxote  |           |
| 1          | 1          | 45  | 1      | 0   | 0         | 1         | AC+Taxote  |           |
| 1          | 1          | 42  | 1      | 0   | 0         | 2         | AC+Taxote  |           |
| 1          | 1          | 48  | 1      | 0   | 0         | 1         | AC+Taxote  |           |
| 1          | 1          | 41  | 1      | 0   | 0         | 2         | AC+Taxote  |           |
| 1          | 1          | 38  | 0      | 0   | 1         | 3         | NEAT:carb  |           |
| 1          | 0          | 47  | 1      | 0   | 0         | 1         | AC+Taxote  |           |
| 1          | 1          | 40  | 0      | 0   | 0         | 1         | AC+Taxote  |           |
| 1          | 1          | 28  | 0      | 0   | 0         | 1         | AC+Taxote  |           |
| 1          | 0          | 55  | 1      | 1   | 0         | 1         | AC+Taxote  |           |
| 1          | 1          | 61  | 1      | 1   | 1         | 3         | NEAT:carb  |           |
| 0          | 0          | 39  | 0      | 0   | 0         | 2         | AC+Taxote  |           |
| 1          | 1          | 71  | 1      | 1   | 1         | 3         | NEAT/CAR   |           |
| 1          | 0          | 55  | 1      | 1   | 0         | 1         | AC+Taxote  |           |
| 1          | 1          | 67  | 1      | 1   | 0         | 1         | AC+Taxote  |           |
| 1          | 1          | 54  | 1      | 1   | 0         | 3         | NEAT: carb |           |
| 0          | 1          | 53  | 1      | 1   | 1         | 1         | AC+Taxote  |           |
| 0          | 1          | 45  | 1      | 0   | 1         | 1         | AC+Taxote  |           |
| 1          | 1          | 54  | 1      | 1   | 1         | 1         | AC+Taxote  |           |
| 0          | 0          | 54  | 1      | 1   | 0         | 3         | HP         |           |
| 1          | 1          | 34  | 0      | 0   | 0         | 3         | NEAT:carb  |           |
| 1          | 1          | 47  | 1      | 0   | 0         | 3         | neat:carbo |           |
| 1          | 1          | 41  | 1      | 0   | 0         | 1         | AC+Taxote  |           |
| 1          | 1          | 38  | 0      | 0   | 0         | 3         | NEAT: Taxo |           |
| 1          | 0          | 58  | 1      | 1   | 1         | 2         | AC+Taxote  |           |
| 0          | 0          | 44  | 1      | 0   | 1         | 1         | AC+Taxote  |           |
| 1          | 1          | 64  | 1      | 1   | 0         | 1         | AC+Taxote  |           |

|   |   |    |   |   |   |              |
|---|---|----|---|---|---|--------------|
| 1 | 1 | 41 | 1 | 0 | 1 | 2 AC+Taxote  |
| 0 | 0 | 55 | 1 | 1 | 0 | 3 NEAT: Carb |
| 0 | 0 | 48 | 1 | 1 | 0 | 1 AC+Taxote  |
| 0 | 1 | 50 | 1 | 0 | 0 | 1 AC+Taxote  |
| 1 | 0 | 53 | 1 | 1 | 0 | 1 AC+Taxote  |
| 1 | 1 | 57 | 1 | 1 | 1 | 1 AC+Taxote  |
| 1 | 0 | 52 | 1 | 0 | 0 | 1 AC+Mono    |
| 1 | 0 | 67 | 1 | 1 | 1 | 1 AC+Taxote  |
| 0 | 0 | 67 | 1 | 1 | 1 | 1 AC+Taxote  |
| 1 | 0 | 56 | 1 | 1 | 1 | 1 AC+ Taxot  |
| 0 | 0 | 48 | 1 | 0 | 0 | 1 AC+Mono    |
| 1 | 1 | 41 | 1 | 0 | 0 | 1 AC+Mono    |
| 0 | 1 | 48 | 1 | 1 | 0 | 1 AC+Mono    |
| 0 | 0 | 42 | 1 | 0 | 1 | 2 AC + Taxo  |
| 1 | 0 | 40 | 0 | 0 | 0 | 1 AC+Taxote  |
| 1 | 0 | 46 | 1 | 1 | 0 | 1 AC+monof   |
| 1 | 0 | 66 | 1 | 1 | 1 | 1 AC+Mono    |
| 1 | 0 | 51 | 1 | 0 | 0 | 1 AC+Mono    |
| 1 | 1 | 51 | 1 | 1 | 0 | 1 AC+Taxote  |
| 1 | 0 | 66 | 1 | 1 | 0 | 1 AC+Taxote  |
| 1 | 1 | 43 | 1 | 0 | 0 | 1 AC+Taxote  |
| 1 | 1 | 55 | 1 | 1 | 1 | 1 AC+ Taxot  |
| 1 | 0 | 37 | 0 | 0 | 1 | 1 AC+Taxote  |
| 0 | 1 | 54 | 1 | 1 | 0 | 1 AC+Taxote  |
| 1 | 0 | 57 | 1 | 1 | 1 | 1 AC+Taxote  |
| 0 | 0 | 31 | 0 | 0 | 0 | 3 TAC        |
| 1 | 1 | 59 | 1 | 1 | 1 | 1 AC+TAXO    |
| 1 | 0 | 43 | 1 | 0 | 0 | 1 AC+Mono    |
| 1 | 1 | 63 | 1 | 1 | 0 | 3 Taxol/Carb |
| 1 | 0 | 58 | 1 | 1 | 0 | 1 AC+Taxote  |
| 0 | 0 | 47 | 1 | 0 | 1 | 1 AC+Taxote  |
| 0 | 0 | 54 | 1 | 1 | 0 | 1 AC+Taxote  |
| 1 | 1 | 70 | 1 | 1 | 1 | 1 AC+Taxote  |
| 0 | 0 | 34 | 0 | 0 | 1 | 1 AC+Taxote  |
| 0 | 0 | 31 | 0 | 0 | 1 | 1 AC+Taxote  |
| 1 | 0 | 68 | 1 | 1 | 0 | 1 AC+Taxote  |
| 1 | 1 | 58 | 1 | 1 | 0 | 1 AC+Taxote  |
| 1 | 0 | 45 | 1 | 0 | 0 | 1 AC+Taxote  |
| 1 | 0 | 56 | 1 | 1 | 0 | 1 AC+Taxote  |
| 1 | 0 | 38 | 0 | 0 | 1 | 1 AC 4호, ter |
| 1 | 1 | 43 | 1 | 0 | 0 | 1 AC-Taxote  |
| 0 | 0 | 45 | 1 | 0 | 0 | 1 Ac+Taxote  |
| 1 | 0 | 58 | 1 | 1 | 0 | 1 AC+monof   |

|   |   |    |   |   |   |             |
|---|---|----|---|---|---|-------------|
| 0 | 0 | 59 | 1 | 1 | 0 | 1 AC+monof  |
| 1 | 1 | 55 | 1 | 1 | 1 | 1 4AC-4T    |
| 0 | 0 | 42 | 1 | 0 | 1 | 1 AC-Taxote |
| 1 | 0 | 37 | 0 | 0 | 0 | 1 AC-Taxote |
| 1 | 1 | 44 | 1 | 0 | 1 | 1 AC-Taxote |
| 0 | 0 | 55 | 1 | 1 | 0 | 1 AC-Taxote |
| 1 | 0 | 53 | 1 | 1 | 0 | 1 4AC-4T    |
| 0 | 0 | 55 | 1 | 1 | 0 | 3 AC        |
| 1 | 1 | 48 | 1 | 1 | 0 | 1 AC-Taxote |
| 1 | 0 | 54 | 1 | 1 | 0 | 1 AC-Taxote |
| 0 | 0 | 33 | 0 | 0 | 0 | 1 4AC-4T    |
| 1 | 1 | 33 | 0 | 0 | 0 | 1 4AC-4T    |
| 1 | 1 | 38 | 0 | 0 | 0 | 1 AC-Taxote |
| 1 | 1 | 52 | 1 | 1 | 1 | 3 TCH       |
| 1 | 0 | 43 | 1 | 0 | 0 | 1 AC+monof  |
| 0 | 0 | 51 | 1 | 0 | 0 | 1 AC+monof  |
| 1 | 0 | 45 | 1 | 0 | 1 | 1 AC+monof  |
| 1 | 0 | 40 | 0 | 0 | 0 | 1 AC-Taxote |
| 1 | 0 | 49 | 1 | 1 | 0 | 1 AC+monof  |
| 1 | 0 | 47 | 1 | 1 | 0 | 1 AC-Taxote |
| 0 | 0 | 46 | 1 | 0 | 0 | 1 AC-Taxote |
| 0 | 0 | 41 | 1 | 0 | 1 | 1 AC-Taxote |
| 1 | 1 | 57 | 1 | 1 | 0 | 1 AC+monof  |
| 0 | 0 | 64 | 1 | 1 | 0 | 1 AC-Taxote |
| 1 | 0 | 68 | 1 | 1 | 0 | 1 AC+monof  |
| 1 | 1 | 64 | 1 | 1 | 1 | 1 AC+Taxote |
| 1 | 1 | 43 | 1 | 0 | 0 | 1 4AC-4T    |
| 1 | 1 | 55 | 1 | 1 | 0 | 1 AC+Taxote |
| 0 | 0 | 48 | 1 | 0 | 0 | 1 AC+monof  |
| 0 | 0 | 44 | 1 | 0 | 1 | 1 AC+monof  |
| 1 | 1 | 42 | 1 | 0 | 0 | 1 AC-Monot  |
| 1 | 1 | 51 | 1 | 0 | 0 | 1 AC-Monot  |

| ini_cT3gro | ini_cLN2gr | HG12_Gro | Mol_Subty | ER_1perce | PR_1perce | final_HER2 | PreKi_15gr |
|------------|------------|----------|-----------|-----------|-----------|------------|------------|
| 1          | 0          | 1        | 3         | 0         | 0         | 0          | 1          |
| 2          | 1          | 1        | 3         | 0         | 0         | 0          | 1          |
| 1          | 1          | 1        | 0         | 0         | 1         | 0          | 1          |
| 2          | 1          | 1        | 3         | 0         | 0         | 0          | 1          |
| 1          | 1          | 0        | 0         | 1         | 1         | 0          | 0          |
| 1          | 1          | 0        | 0         | 1         | 0         | 0          | 0          |
| 2          | 1          | 0        | 0         | 1         | 1         | 0          | 9          |
| 2          | 1          | 1        | 0         | 1         | 1         | 0          | 0          |
| 2          | 1          | 0        | 0         | 1         | 0         | 0          | 1          |
| 1          | 1          | 0        | 0         | 1         | 1         | 0          | 9          |
| 1          | 1          | 1        | 3         | 0         | 0         | 0          | 1          |
| 1          | 1          | 1        | 0         | 1         | 1         | 0          | 9          |
| 3          | 0          | 1        | 3         | 0         | 0         | 0          | 9          |
| 2          | 1          | 0        | 3         | 0         | 0         | 0          | 1          |
| 1          | 1          | 0        | 1         | 1         | 0         | 1          | 0          |
| 2          | 1          | 1        | 2         | 0         | 0         | 1          | 0          |
| 1          | 1          | 0        | 2         | 0         | 0         | 1          | 0          |
| 2          | 1          | 1        | 0         | 1         | 0         | 0          | 1          |
| 2          | 1          | 1        | 1         | 1         | 1         | 1          | 1          |
| 3          | 1          | 1        | 0         | 1         | 1         | 0          | 0          |
| 1          | 0          | 1        | 3         | 0         | 0         | 0          | 1          |
| 2          | 1          | 0        | 0         | 1         | 0         | 0          | 0          |
| 2          | 1          | 0        | 0         | 1         | 1         | 0          | 9          |
| 2          | 1          | 0        | 1         | 1         | 1         | 1          | 9          |
| 2          | 1          | 0        | 2         | 0         | 0         | 1          | 0          |
| 2          | 1          | 1        | 3         | 0         | 0         | 0          | 1          |
| 2          | 1          | 0        | 0         | 1         | 0         | 0          | 0          |
| 2          | 1          | 1        | 3         | 0         | 0         | 0          | 1          |
| 1          | 1          | 1        | 1         | 1         | 0         | 1          | 0          |
| 2          | 1          | 0        | 1         | 1         | 0         | 1          | 0          |
| 2          | 1          | 0        | 3         | 0         | 0         | 0          | 1          |
| 1          | 1          | 1        | 3         | 0         | 0         | 0          | 1          |
| 3          | 1          | 0        | 0         | 1         | 1         | 0          | 1          |
| 2          | 1          | 1        | 2         | 0         | 0         | 1          | 1          |
| 1          | 1          | 0        | 3         | 0         | 0         | 0          | 1          |
| 3          | 0          | 1        | 3         | 0         | 0         | 0          | 1          |
| 1          | 1          | 1        | 3         | 0         | 0         | 0          | 1          |
| 2          | 1          | 1        | 0         | 1         | 0         | 0          | 1          |
| 2          | 0          | 0        | 3         | 0         | 0         | 0          | 1          |
| 1          | 1          | 0        | 0         | 1         | 1         | 0          | 1          |
| 2          | 1          | 1        | 3         | 0         | 0         | 0          | 1          |
| 2          | 1          | 0        | 2         | 0         | 0         | 1          | 0          |



|   |   |   |   |   |   |   |   |
|---|---|---|---|---|---|---|---|
| 1 | 1 | 1 | 0 | 1 | 0 | 0 | 1 |
| 1 | 1 | 1 | 3 | 0 | 0 | 0 | 1 |
| 3 | 1 | 0 | 0 | 1 | 1 | 0 | 0 |
| 3 | 0 | 0 | 0 | 1 | 0 | 0 | 0 |
| 2 | 1 | 1 | 2 | 0 | 0 | 1 | 1 |
| 2 | 1 | 0 | 1 | 1 | 1 | 1 | 0 |
| 2 | 1 | 0 | 2 | 0 | 0 | 1 | 1 |
| 1 | 1 | 1 | 2 | 0 | 0 | 1 | 9 |
| 2 | 1 | 1 | 1 | 1 | 0 | 1 | 1 |
| 2 | 1 | 1 | 3 | 0 | 0 | 0 | 1 |
| 2 | 1 | 0 | 0 | 1 | 1 | 0 | 0 |
| 2 | 1 | 0 | 3 | 0 | 0 | 0 | 1 |
| 3 | 1 | 0 | 1 | 1 | 1 | 1 | 1 |
| 1 | 1 | 0 | 0 | 1 | 1 | 0 | 1 |
| 1 | 1 | 1 | 2 | 0 | 0 | 1 | 0 |
| 1 | 1 | 0 | 0 | 1 | 1 | 0 | 0 |
| 1 | 1 | 1 | 3 | 0 | 0 | 0 | 1 |
| 2 | 1 | 0 | 0 | 1 | 1 | 0 | 0 |
| 2 | 1 | 1 | 1 | 1 | 0 | 1 | 9 |
| 1 | 1 | 1 | 2 | 0 | 0 | 1 | 9 |
| 1 | 1 | 0 | 0 | 1 | 1 | 0 | 0 |
| 2 | 1 | 1 | 2 | 0 | 0 | 1 | 0 |
| 1 | 1 | 1 | 3 | 0 | 0 | 0 | 1 |
| 2 | 1 | 0 | 2 | 0 | 0 | 1 | 1 |
| 2 | 1 | 1 | 3 | 0 | 0 | 0 | 1 |
| 1 | 1 | 0 | 3 | 0 | 0 | 0 | 9 |
| 3 | 1 | 1 | 3 | 0 | 0 | 0 | 0 |
| 2 | 1 | 0 | 3 | 0 | 0 | 0 | 9 |
| 2 | 0 | 0 | 3 | 0 | 0 | 0 | 0 |
| 2 | 1 | 0 | 1 | 1 | 0 | 1 | 1 |
| 2 | 1 | 1 | 0 | 1 | 0 | 0 | 1 |
| 2 | 1 | 0 | 3 | 0 | 0 | 0 | 1 |
| 1 | 1 | 1 | 2 | 0 | 0 | 1 | 0 |
| 2 | 1 | 1 | 3 | 0 | 0 | 0 | 1 |
| 1 | 0 | 0 | 3 | 0 | 0 | 0 | 1 |
| 1 | 1 | 0 | 2 | 0 | 0 | 1 | 0 |
| 2 | 1 | 0 | 2 | 0 | 0 | 1 | 1 |
| 1 | 1 | 0 | 1 | 1 | 1 | 1 | 0 |
| 1 | 1 | 0 | 2 | 0 | 0 | 1 | 1 |
| 2 | 1 | 0 | 3 | 0 | 0 | 0 | 1 |
| 3 | 1 | 0 | 3 | 0 | 0 | 0 | 1 |
| 1 | 1 | 0 | 1 | 1 | 1 | 1 | 1 |
| 2 | 1 | 0 | 1 | 1 | 0 | 1 | 1 |

|   |   |   |   |   |   |   |   |
|---|---|---|---|---|---|---|---|
| 3 | 1 | 1 | 2 | 0 | 0 | 1 | 1 |
| 2 | 0 | 0 | 2 | 0 | 0 | 1 | 1 |
| 1 | 1 | 0 | 0 | 1 | 1 | 0 | 1 |
| 2 | 1 | 0 | 2 | 0 | 0 | 1 | 1 |
| 2 | 1 | 0 | 3 | 0 | 0 | 0 | 1 |
| 1 | 1 | 1 | 3 | 0 | 0 | 0 | 1 |
| 2 | 0 | 0 | 3 | 0 | 0 | 0 | 0 |
| 2 | 1 | 1 | 2 | 0 | 0 | 1 | 1 |
| 2 | 1 | 0 | 1 | 1 | 0 | 1 | 0 |
| 2 | 1 | 1 | 0 | 1 | 0 | 0 | 0 |
| 2 | 0 | 0 | 1 | 1 | 0 | 1 | 1 |
| 2 | 0 | 1 | 3 | 0 | 0 | 0 | 1 |
| 3 | 1 | 1 | 1 | 1 | 0 | 1 | 0 |
| 3 | 1 | 1 | 2 | 0 | 0 | 1 | 9 |
| 2 | 1 | 0 | 0 | 1 | 1 | 0 | 1 |
| 1 | 0 | 0 | 0 | 1 | 0 | 0 | 1 |
| 1 | 1 | 0 | 1 | 1 | 0 | 1 | 1 |
| 2 | 1 | 0 | 3 | 0 | 0 | 0 | 1 |
| 2 | 1 | 0 | 0 | 1 | 0 | 0 | 0 |
| 1 | 1 | 1 | 3 | 0 | 0 | 0 | 1 |
| 2 | 1 | 0 | 0 | 1 | 1 | 0 | 0 |
| 2 | 1 | 0 | 0 | 1 | 1 | 0 | 0 |
| 2 | 1 | 0 | 1 | 1 | 0 | 1 | 1 |
| 1 | 1 | 1 | 3 | 0 | 0 | 0 | 1 |
| 2 | 1 | 1 | 2 | 0 | 0 | 1 | 1 |
| 3 | 1 | 1 | 2 | 0 | 0 | 1 | 1 |
| 3 | 0 | 1 | 2 | 0 | 0 | 1 | 1 |
| 2 | 1 | 0 | 3 | 0 | 0 | 0 | 0 |
| 1 | 1 | 0 | 0 | 1 | 1 | 0 | 0 |
| 2 | 1 | 0 | 3 | 0 | 0 | 0 | 1 |
| 2 | 1 | 1 | 1 | 1 | 0 | 1 | 0 |
| 2 | 1 | 1 | 2 | 0 | 0 | 1 | 1 |

| OpName_c | PRE_1_MM | PRE_1_US | PRE_1_MRI |
|----------|----------|----------|-----------|
| 0        | 0.1875   | 0.25     | 0.253968  |
| 0        | 0.517647 | 0.25     | 0.62963   |
| 0        | 0.517647 | 0.506173 | 0.62963   |
| 1        | 0.517647 | 0.506173 | 0.62963   |
| 0        | 0.1875   | 0.506173 | 0.253968  |
| 1        | 0.517647 | 0.506173 | 0.62963   |
| 0        | 0.517647 | 0.506173 | 0.62963   |
| 1        | 0.517647 | 0.506173 | 0.62963   |
| 0        | 0.517647 | 0.506173 | 0.62963   |
| 0        | 0.1875   | 0.25     | 0.253968  |
| 0        | 0.1875   | 0.25     | 0.62963   |
| 1        | 0.517647 | 0.25     | 0.62963   |
| 0        | 0.517647 | 0.506173 | 0.253968  |
| 0        | 0.517647 | 0.506173 | 0.253968  |
| 0        | 0.517647 | 0.506173 | 0.253968  |
| 0        | 0.517647 | 0.25     | 0.253968  |
| 1        | 0.517647 | 0.506173 | 0.62963   |
| 1        | 0.517647 | 0.506173 | 0.62963   |
| 0        | 0.517647 | 0.506173 | 0.62963   |
| 1        | 0.517647 | 0.506173 | 0.62963   |
| 0        | 0.517647 | 0.506173 | 0.62963   |
| 0        | 0.517647 | 0.506173 | 0.253968  |
| 0        | 0.517647 | 0.506173 | 0.62963   |
| 1        | 0.517647 | 0.506173 | 0.62963   |
| 1        | 0.517647 | 0.506173 | 0.253968  |
| 0        | 0.517647 | 0.506173 | 0.62963   |
| 0        | 0.517647 | 0.25     | 0.253968  |
| 1        | 0.517647 | 0.506173 | 0.62963   |
| 0        | 0.1875   | 0.506173 | 0.253968  |
| 1        | 0.517647 | 0.506173 | 0.62963   |
| 1        | 0.517647 | 0.506173 | 0.62963   |
| 1        | 0.517647 | 0.25     | 0.62963   |
| 1        | 0.517647 | 0.25     | 0.62963   |
| 1        | 0.517647 | 0.506173 | 0.62963   |
| 0        | 0.1875   | 0.25     | 0.253968  |
| 0        | 0.517647 | 0.506173 | 0.62963   |
| 1        | 0.517647 | 0.506173 | 0.62963   |
| 1        | 0.517647 | 0.506173 | 0.62963   |
| 0        | 0.517647 | 0.506173 | 0.62963   |
| 0        | 0.1875   | 0.506173 | 0.253968  |
| 0        | 0.1875   | 0.25     | 0.253968  |
| 0        | 0.517647 | 0.506173 | 0.62963   |

|   |          |          |          |
|---|----------|----------|----------|
| 0 | 0.517647 | 0.506173 | 0.62963  |
| 0 | 0.1875   | 0.25     | 0.253968 |
| 1 | 0.1875   | 0.25     | 0.253968 |
| 1 | 0.517647 | 0.25     | 0.62963  |
| 1 | 0.517647 | 0.506173 | 0.253968 |
| 0 | 0.517647 | 0.506173 | 0.62963  |
| 1 | 0.1875   | 0.506173 | 0.253968 |
| 1 | 0.517647 | 0.506173 | 0.253968 |
| 0 | 0.517647 | 0.25     | 0.253968 |
| 1 | 0.1875   | 0.506173 | 0.253968 |
| 1 | 0.1875   | 0.25     | 0.253968 |
| 0 | 0.517647 | 0.506173 | 0.62963  |
| 1 | 0.517647 | 0.25     | 0.62963  |
| 1 | 0.517647 | 0.25     | 0.253968 |
| 0 | 0.517647 | 0.506173 | 0.253968 |
| 0 | 0.517647 | 0.506173 | 0.253968 |
| 0 | 0.1875   | 0.506173 | 0.253968 |
| 1 | 0.517647 | 0.506173 | 0.253968 |
| 0 | 0.517647 | 0.506173 | 0.62963  |
| 1 | 0.1875   | 0.506173 | 0.253968 |
| 1 | 0.517647 | 0.506173 | 0.62963  |
| 1 | 0.517647 | 0.506173 | 0.62963  |
| 0 | 0.1875   | 0.506173 | 0.253968 |
| 1 | 0.517647 | 0.25     | 0.62963  |
| 0 | 0.517647 | 0.506173 | 0.253968 |
| 0 | 0.1875   | 0.25     | 0.253968 |
| 1 | 0.517647 | 0.506173 | 0.62963  |
| 0 | 0.517647 | 0.506173 | 0.253968 |
| 1 | 0.517647 | 0.506173 | 0.62963  |
| 1 | 0.517647 | 0.506173 | 0.253968 |
| 1 | 0.1875   | 0.25     | 0.253968 |
| 0 | 0.1875   | 0.25     | 0.253968 |
| 0 | 0.517647 | 0.506173 | 0.62963  |
| 0 | 0.1875   | 0.25     | 0.253968 |
| 0 | 0.517647 | 0.25     | 0.253968 |
| 0 | 0.1875   | 0.506173 | 0.253968 |
| 0 | 0.517647 | 0.506173 | 0.62963  |
| 1 | 0.517647 | 0.506173 | 0.253968 |
| 0 | 0.517647 | 0.506173 | 0.253968 |
| 0 | 0.517647 | 0.506173 | 0.253968 |
| 1 | 0.517647 | 0.506173 | 0.62963  |
| 0 | 0.517647 | 0.25     | 0.253968 |
| 0 | 0.1875   | 0.506173 | 0.253968 |

|   |          |          |          |
|---|----------|----------|----------|
| 1 | 0.517647 | 0.25     | 0.253968 |
| 0 | 0.517647 | 0.506173 | 0.62963  |
| 0 | 0.517647 | 0.25     | 0.253968 |
| 0 | 0.517647 | 0.506173 | 0.253968 |
| 0 | 0.517647 | 0.506173 | 0.62963  |
| 0 | 0.1875   | 0.25     | 0.253968 |
| 0 | 0.517647 | 0.506173 | 0.253968 |
| 0 | 0.1875   | 0.25     | 0.253968 |
| 1 | 0.517647 | 0.506173 | 0.62963  |
| 0 | 0.517647 | 0.506173 | 0.253968 |
| 0 | 0.1875   | 0.25     | 0.253968 |
| 0 | 0.517647 | 0.506173 | 0.62963  |
| 1 | 0.517647 | 0.506173 | 0.62963  |
| 1 | 0.517647 | 0.506173 | 0.62963  |
| 0 | 0.517647 | 0.506173 | 0.253968 |
| 1 | 0.1875   | 0.25     | 0.253968 |
| 0 | 0.1875   | 0.506173 | 0.253968 |
| 1 | 0.517647 | 0.506173 | 0.253968 |
| 0 | 0.517647 | 0.506173 | 0.253968 |
| 0 | 0.1875   | 0.506173 | 0.253968 |
| 0 | 0.1875   | 0.25     | 0.253968 |
| 1 | 0.517647 | 0.25     | 0.253968 |
| 1 | 0.517647 | 0.506173 | 0.62963  |
| 0 | 0.1875   | 0.25     | 0.253968 |
| 0 | 0.1875   | 0.506173 | 0.253968 |
| 1 | 0.517647 | 0.506173 | 0.62963  |
| 1 | 0.517647 | 0.506173 | 0.62963  |
| 0 | 0.517647 | 0.506173 | 0.62963  |
| 1 | 0.517647 | 0.25     | 0.253968 |
| 0 | 0.517647 | 0.25     | 0.253968 |
| 1 | 0.517647 | 0.506173 | 0.62963  |
| 1 | 0.1875   | 0.506173 | 0.62963  |
